# Supplementary material for: Deep phylogeny of cancer drivers and compensatory mutations
Source: PubMed Central journal article supplement (PMC7532533; doi:10.1038/s42003-020-01276-7), 2020-10-02
Supplement: 42003_2020_1276_MOESM1_ESM.pdf [file 42003_2020_1276_MOESM1_ESM.pdf]

1

2

# **Deep Phylogeny of Cancer Drivers and Compensatory Mutations**

3

4

5

Nash D. Rochman<sup>1</sup>, Yuri I. Wolf<sup>1</sup>, and Eugene V. Koonin<sup>1,\*</sup>

6

<sup>1</sup>National Center for Biotechnology Information, National Library of Medicine, Bethesda, MD 20894

7

8

For correspondence: [koonin@ncbi.nlm.nih.gov](mailto:koonin@ncbi.nlm.nih.gov)

9

10

Keywords: cancer driver gene, cancer driver mutation, compensatory mutation, deep

11

phylogeny, epistasis within proteins

12

13 **Supplementary Figures**

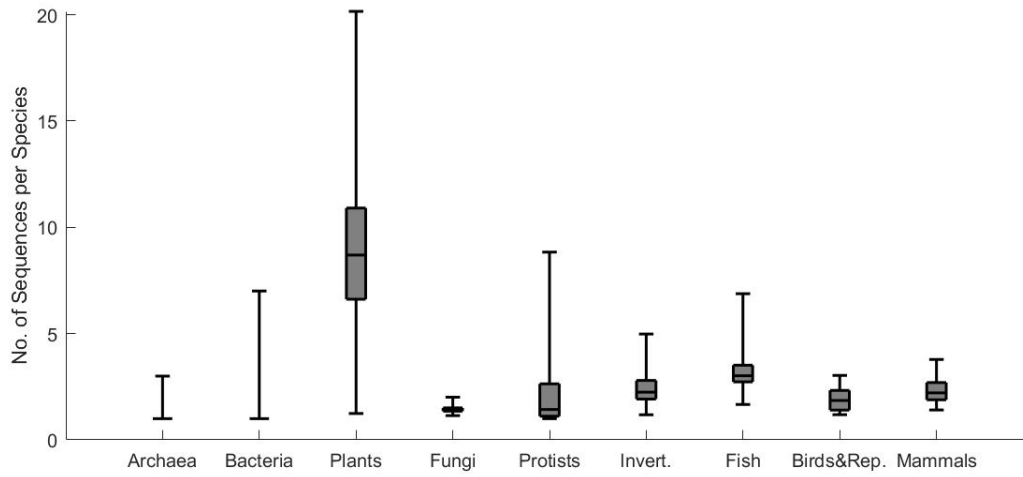

14

15 **Supplementary Figure 1. Number of Sequences Per Species Per MSA** Box plot of  
16 major taxonomic groups.

17

18

19

20

21

22

23

24

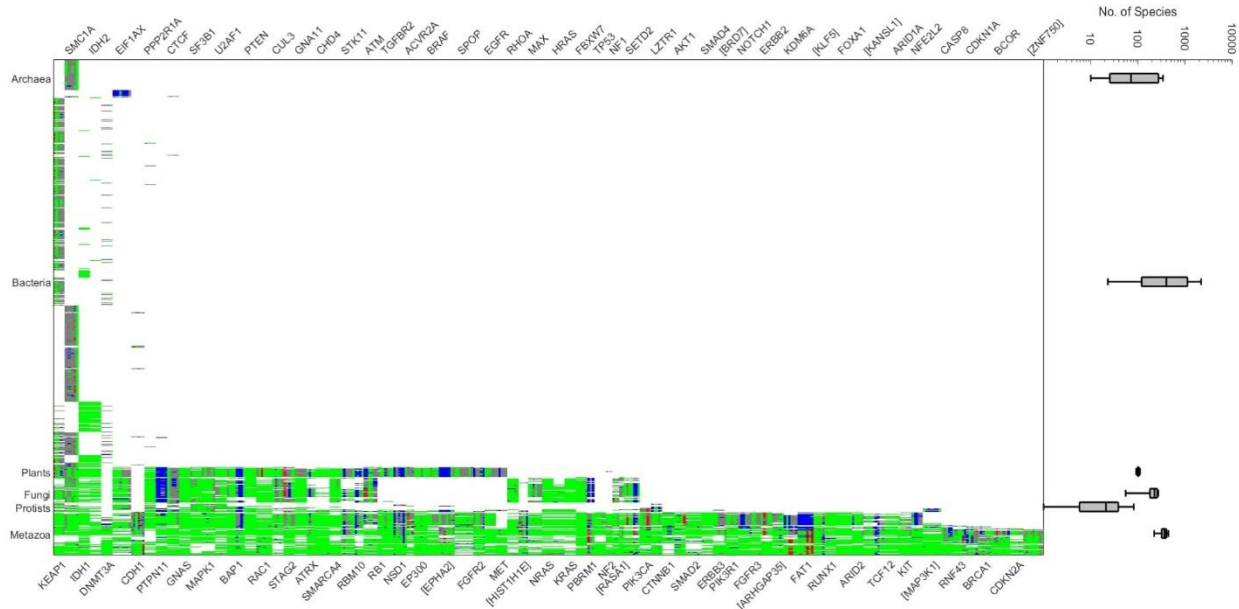

25  
 26 **Supplementary Figure 2. Cancer Driver Phylogeny Through Prokaryotes Summary**  
 27 of driver phylogeny. Each row represents one species, each column one driver. Sites  
 28 harboring multiple drivers appear multiple times. Colors correspond to mode residues  
 29 over all sequences from each species in each site: white=absent from MSA, blue=gap,  
 30 green=human reference residue, red=driver, gray=any other residue. Species are  
 31 ordered by taxonomy, and within labelled clades by appearance within # of MSA. Sites  
 32 are ordered by harboring gene phylogenetic depth. Rows are followed by box plots of  
 33 number of species within each clade observed across MSA where that clade is  
 34 represented. Whiskers are at 2/98%. For a focused view on Eukaryotes see Fig. 1F/H.  
 35  
 36

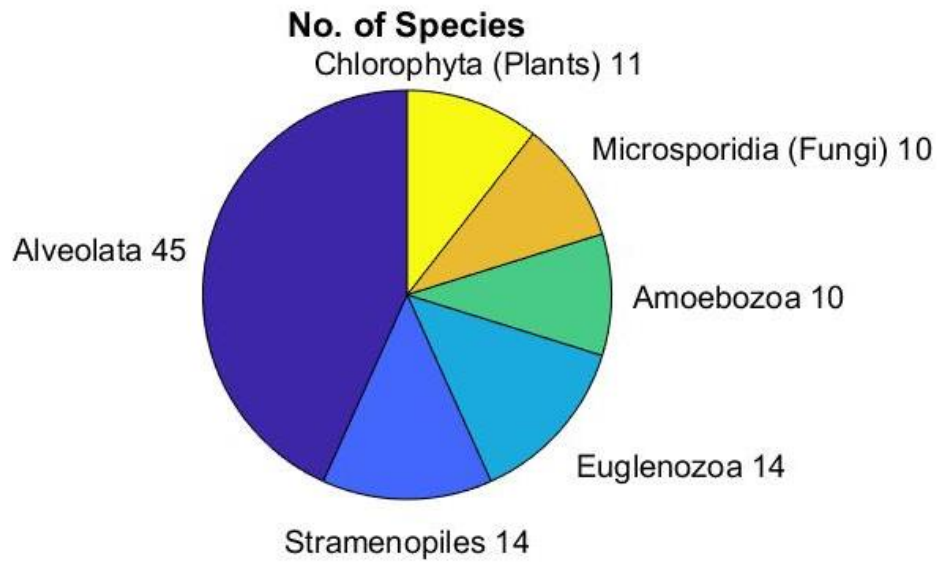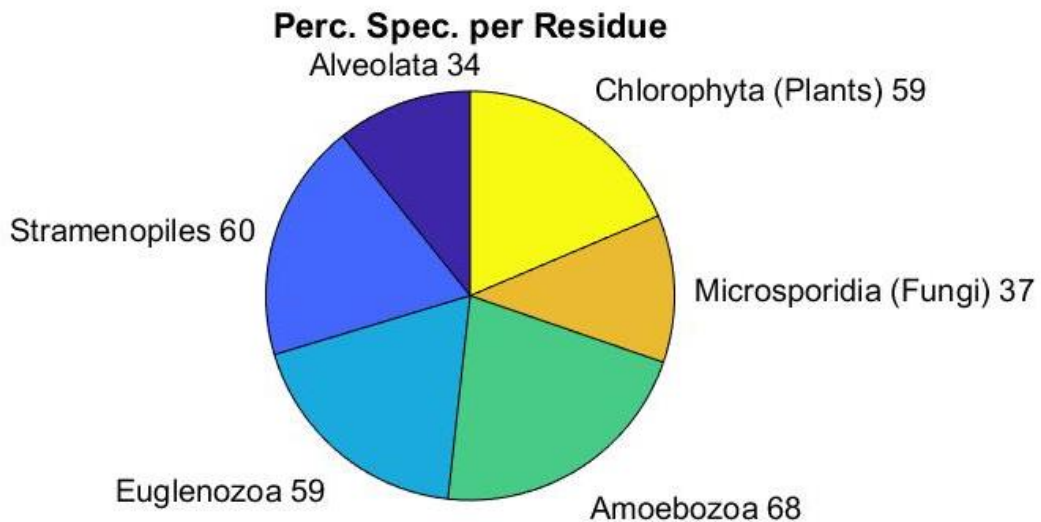

37  
 38 **Supplementary Figure 3. Available Protist Phylogeny** Few protists appear across all  
 39 MSA. Most are in Alveolata. Members of Alveolata are particularly unevenly distributed  
 40 across the MSA with only 34% of total species present in any MSA found in any given  
 41 MSA (Percent Species per Residue).

42

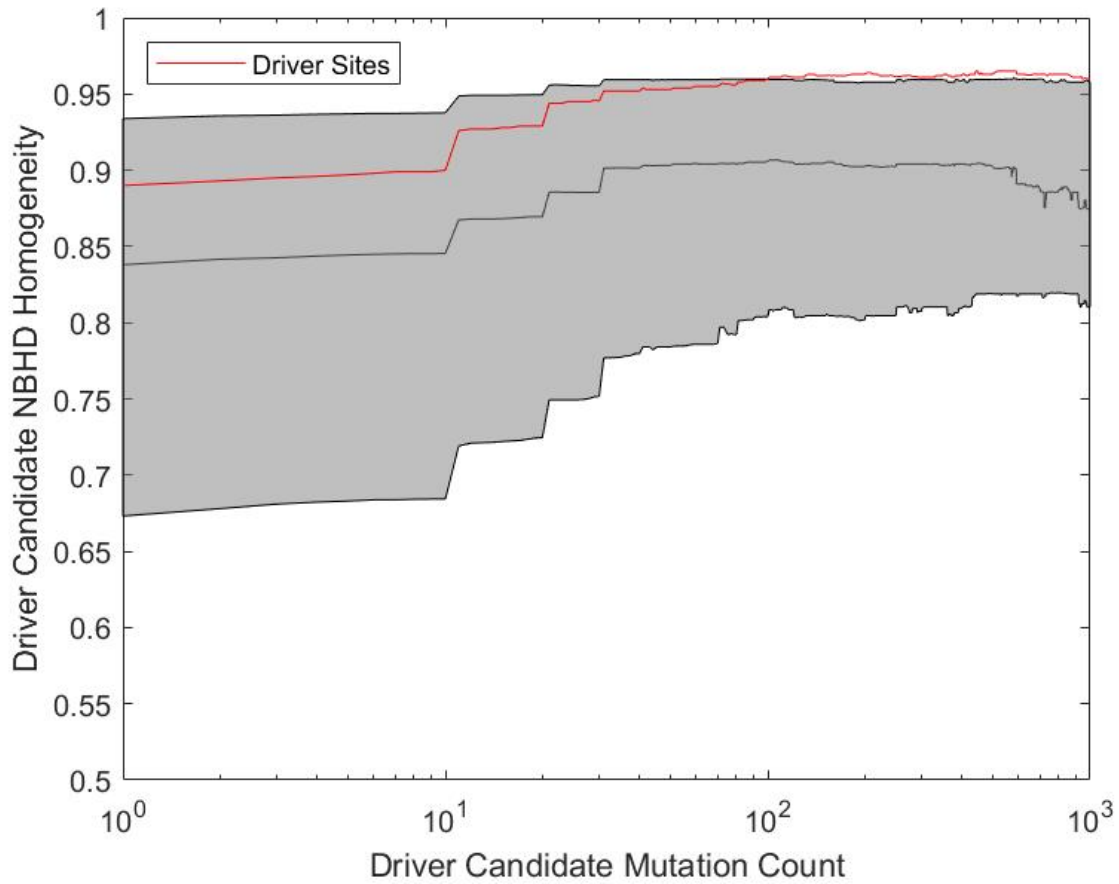

44

45 **Supplementary Figure 4. Vertebrate Homogeneity Binned By Mutation Frequency**46 Median vertebrate homogeneity of COSMIC mutation nbhds ( $\pm 3$  sites) and sites47 logarithmically binned by mutation count (number of tumors). 25<sup>th</sup>-75<sup>th</sup> percentiles

48 shaded.

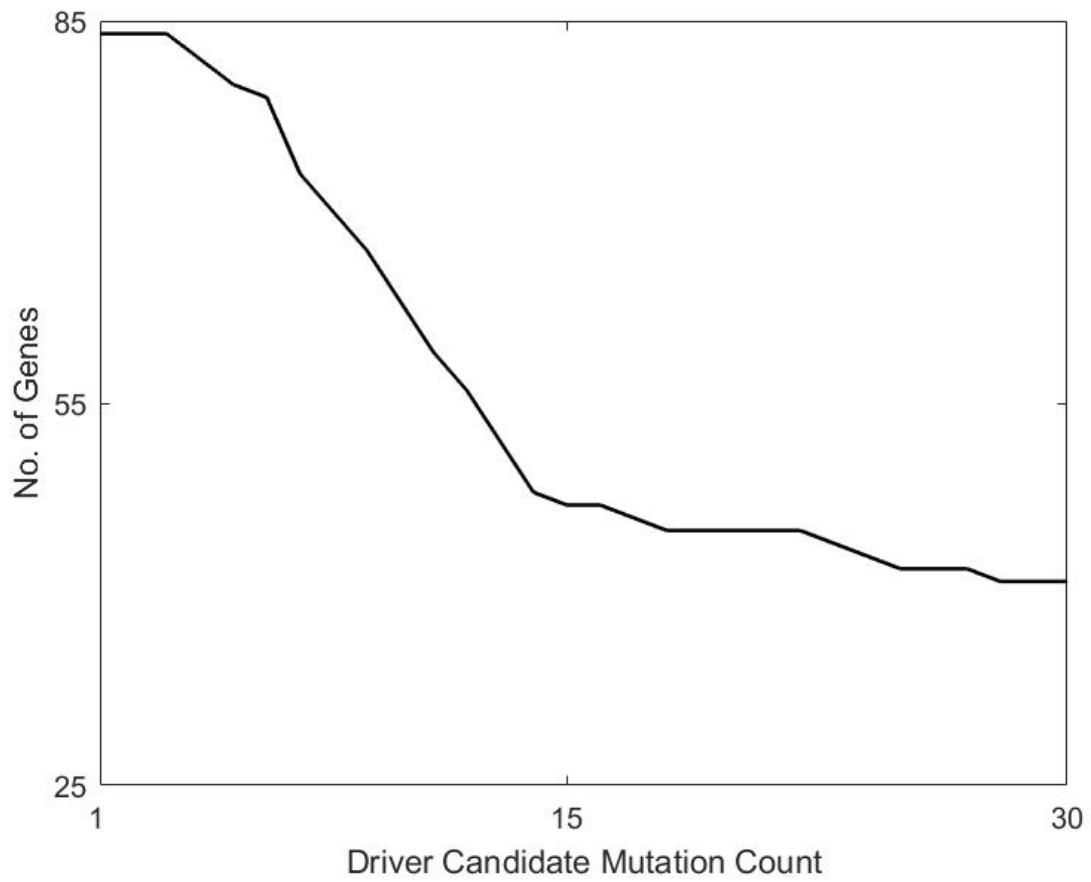

49

50 **Supplementary Figure 5. Number of Drivers with Given Mutation Frequency**

51 #Driver genes (84 total) with at least 1 missense mutation of specified cosmic mutation

52 frequency.

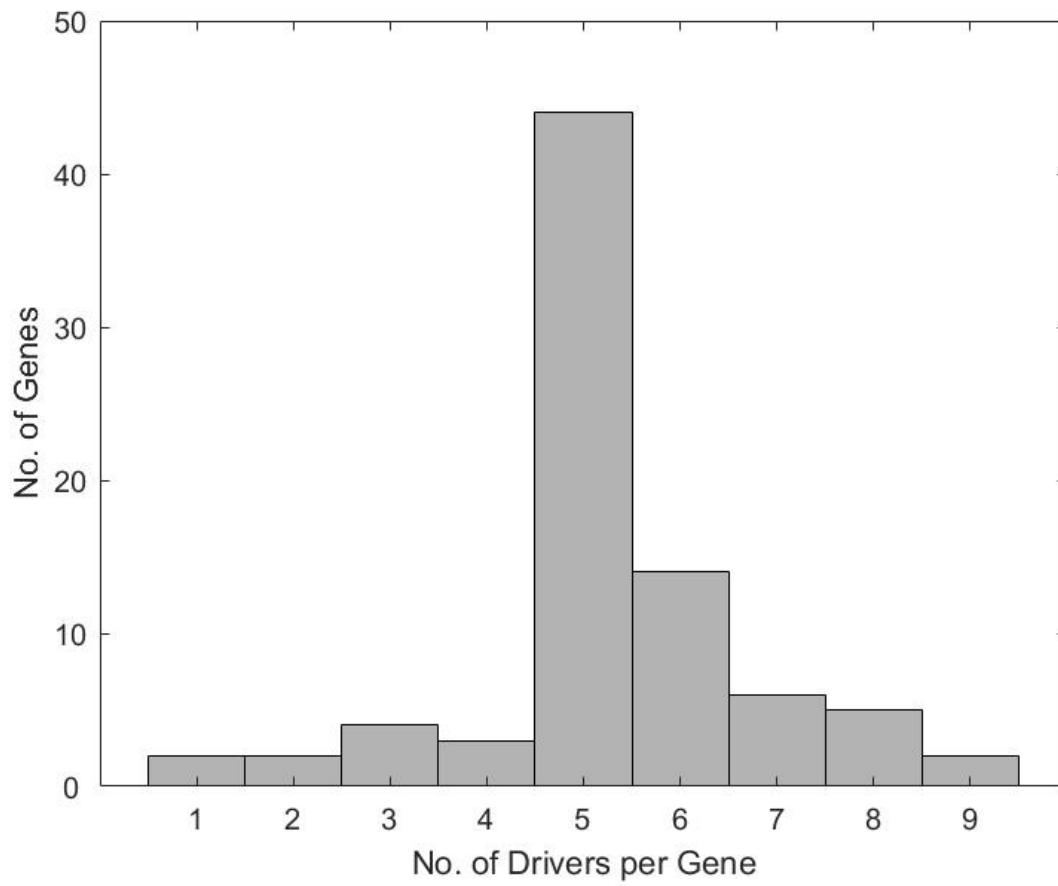

53

54 **Supplementary Figure 6. Number of Drivers Designated per Gene**

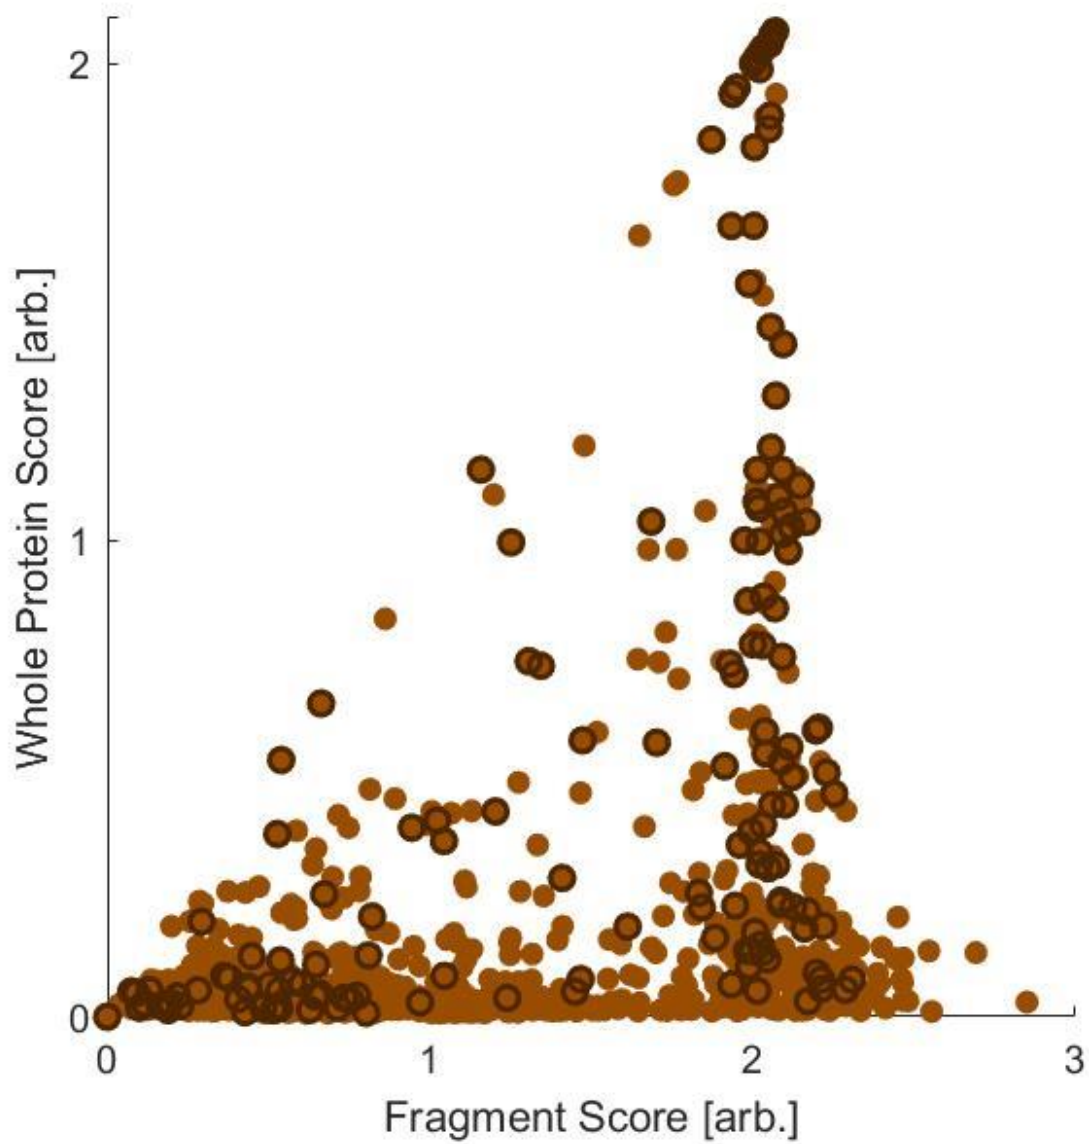

55

56 **Supplementary Figure 7. Maximum Identity Score Against PDB Structures** All sites  
57 in driver genes with driver sites outlined in black. Global Score vs. driver-containing  
58 Local Score. Global Score  $\leq$  Local Score, see Methods; Fig. S8 for details.



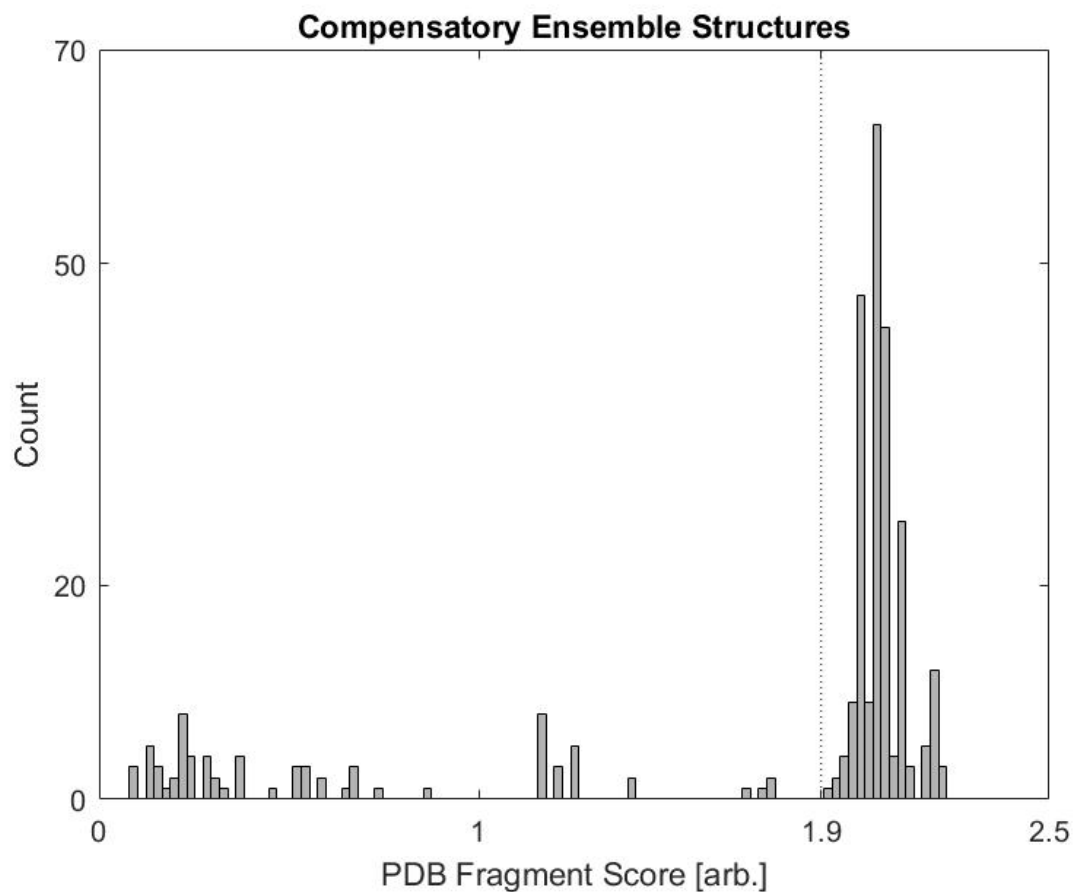

59

60 **Supplementary Figure 8. Distribution of Local Scores for PDB Structures**  
61 **Encompassing Drivers and Compensatory Ensembles** Vertical line at threshold  
62 score of 1.9.

63

64

65

66

RBM10

|                |  |                                                                                                 |   |   |   |   |   |   |   |   |    |   |   |   |   |   |     |   |   |   |
|----------------|--|-------------------------------------------------------------------------------------------------|---|---|---|---|---|---|---|---|----|---|---|---|---|---|-----|---|---|---|
|                |  | 4                                                                                               | 9 | 4 | 9 | 4 | 9 | 4 | 9 | 4 | // | 4 | 9 | 4 | 9 | 4 | 8 9 | 4 | 9 | 4 |
|                |  | 0                                                                                               | 0 | 1 | 1 | 2 | 2 | 3 | 3 | 4 | // | 7 | 7 | 8 | 8 | 9 | 9 9 | 0 | 0 | 1 |
|                |  | 1                                                                                               | 1 | 1 | 1 | 1 | 1 | 1 | 1 | 1 | // | 3 | 3 | 3 | 3 | 3 | 3 3 | 4 | 4 | 4 |
| Mammal         |  | DQDYRTEQGEEEEEE E D--EEEEKASNI VMLRMLPQAATEDDI//LTIDGKTINVEFAKGSKRDMASNEGSRI N AASVASTAIAAAQWAI |   |   |   |   |   |   |   |   |    |   |   |   |   |   |     |   |   |   |
| Mammal         |  | DQDYRTEQGEEEE-- E EEEEEEKASNI VMLRMLPQAATEDDI//LTIDGKTINVEFAKGSKRDMASNEGSRI N AASVASTAIAAAQWAI  |   |   |   |   |   |   |   |   |    |   |   |   |   |   |     |   |   |   |
| Mammal         |  | DQDYRTEQGEEDEEE E E--EEEEKASNI VMLRMLPQAATEDDI//LTIDGKTINVEFAKGSKRDMASNEGSRI N AASVASTAIAAAQWAI |   |   |   |   |   |   |   |   |    |   |   |   |   |   |     |   |   |   |
| Mammal         |  | DQDYRTEQGEEEE-- E EEEEEEKASNI VMLRMLPQAATEDDI//LTIDGKTINVEFAKGSKRDMASNEGSRI N AASVASTAIAAAQWAI  |   |   |   |   |   |   |   |   |    |   |   |   |   |   |     |   |   |   |
| Mammal         |  | DQDYRTEQGEEEE-- E EEEEEEKASNI VMLRMLPQAATEDDI//LTIDGKTINVEFAKGSKRDMASNEGSRI N AASVASTAIAAAQWAI  |   |   |   |   |   |   |   |   |    |   |   |   |   |   |     |   |   |   |
| Mammal         |  | DQDYRTEQGEEEE-- E EEEEEEKASNI VMLRMLPQAATEDDI//LTIDGKTINVEFAKGSKRDMASNEGSRI N AASVASTAIAAAQWAI  |   |   |   |   |   |   |   |   |    |   |   |   |   |   |     |   |   |   |
| Glire          |  | DQDYRTEQGEEEEEE D E--EEEEKASNI VMLRMLPQAATEDDI//LTIDGKTINVEFAKGSKRDMASNEGSRI N AASVASTAIAAAQWAI |   |   |   |   |   |   |   |   |    |   |   |   |   |   |     |   |   |   |
| Glire          |  | DQDYRTEQGEEEEEE D E--EEEEKASNI VMLRMLPQAATEDDI//LTIDGKTINVEFAKGSKRDMASNEGSRI N AASVASTAIAAAQWAI |   |   |   |   |   |   |   |   |    |   |   |   |   |   |     |   |   |   |
| Glire          |  | DQDYRTEQGEEEEEE D E--EEEEKASNI VMLRMLPQAATEDDI//LTIDGKTINVEFAKGSKRDMASNEGSRI N AASVASTAIAAAQWAI |   |   |   |   |   |   |   |   |    |   |   |   |   |   |     |   |   |   |
| Glire          |  | DQDYRTEQGEEEEEE E E--EEEEKASNI VMLRMLPQAATEDDI//LTIDGKTINVEFAKGSKRDMASNEGSRI N AASVASTAIAAAQWAI |   |   |   |   |   |   |   |   |    |   |   |   |   |   |     |   |   |   |
| Glire          |  | DQDYRTEQGEEEEED E E--EEEEKASNI VMLRMLPQAATEDDI//LTIDGKTINVEFAKGSKRDMASNEGSRI N AASVASTAIAAAQWAI |   |   |   |   |   |   |   |   |    |   |   |   |   |   |     |   |   |   |
| Glire          |  | DQDYRTEQGEEEEEE E D--EEEEKASNI VMLRMLPQAATEDDI//LTIDGKTINVEFAKGSKRDMASNEGSRI N AASVASTAIAAAQWAI |   |   |   |   |   |   |   |   |    |   |   |   |   |   |     |   |   |   |
| Glire          |  | DQDYRTEQGEEEEEE E E--DEEEKASNI IMLRMLPQAASEDDI//LTIDGKTINVEFAKGSKRDMASNEGSRI N AASVASTAIAAAQWAI |   |   |   |   |   |   |   |   |    |   |   |   |   |   |     |   |   |   |
| Simiiforme     |  | DQDYRTEQGEDEEEE E D--EEEEKASNI VMLRMLPQAATEDDI//LTIDGKTINVEFAKGSKRDMASNEGSRI S AASVASTAIAAAQWAI |   |   |   |   |   |   |   |   |    |   |   |   |   |   |     |   |   |   |
| Simiiforme     |  | DQDYRTEQGEDEEEE E D--EEEEKASNI VMLRMLPQAATEDDI//LTIDGKTINVEFAKGSKRDMASNEGSRI S AASVASTAIAAAQWAI |   |   |   |   |   |   |   |   |    |   |   |   |   |   |     |   |   |   |
| Simiiforme     |  | DQDYRTEQGEDEEEE E D--EEEEKASNI VMLRMLPQAATEDDI//LTIDGKTINVEFAKGSKRDMASNEGSRI S AASVASTAIAAAQWAI |   |   |   |   |   |   |   |   |    |   |   |   |   |   |     |   |   |   |
| Simiiforme     |  | DQDYRTEQGEDEEEE E D--EEEEKASNI VMLRMLPQAATEDDI//LTIDGKTINVEFAKGSKRDMASNEGSRI S AASVASTAIAAAQWAI |   |   |   |   |   |   |   |   |    |   |   |   |   |   |     |   |   |   |
| Simiiforme     |  | DQDYRTEQGEDEEEE E D--EEEEKASNI VMLRMLPQAATEDDI//LTIDGKTINVEFAKGSKRDMASNEGSRI S AASVASTAIAAAQWAI |   |   |   |   |   |   |   |   |    |   |   |   |   |   |     |   |   |   |
| Target [Human] |  | DQDYRTEQGEEEEEE E D--EEEEKASNI VMLRMLPQAATEDDI//LTIDGKTINVEFAKGSKRDMASNEGSRI S AASVASTAIAAAQWAI |   |   |   |   |   |   |   |   |    |   |   |   |   |   |     |   |   |   |

67

68 **Supplementary Figure 9. Reduced MSA for driver gene *RBM10* Driver E119D and**

69 **compensator S398N highlighted. The driver neighborhood in the MSA is almost**

70 **exclusively composed of gaps outside of mammalian sequences. Within mammals there**

71 **are multiple isoforms of *RBM10* about half of which have gaps in the driver**

72 **neighborhood as well. The compensator residue 398N is ancestral transitioning to the**

73 **human reference residue 398S at siimiformes and the driver is relatively common**

74 **among mammals, approaching 15% among glires suggesting the driver residue may**

75 **only be deleterious among higher primates due to the absence of the compensator**

76 **S398N.**

77

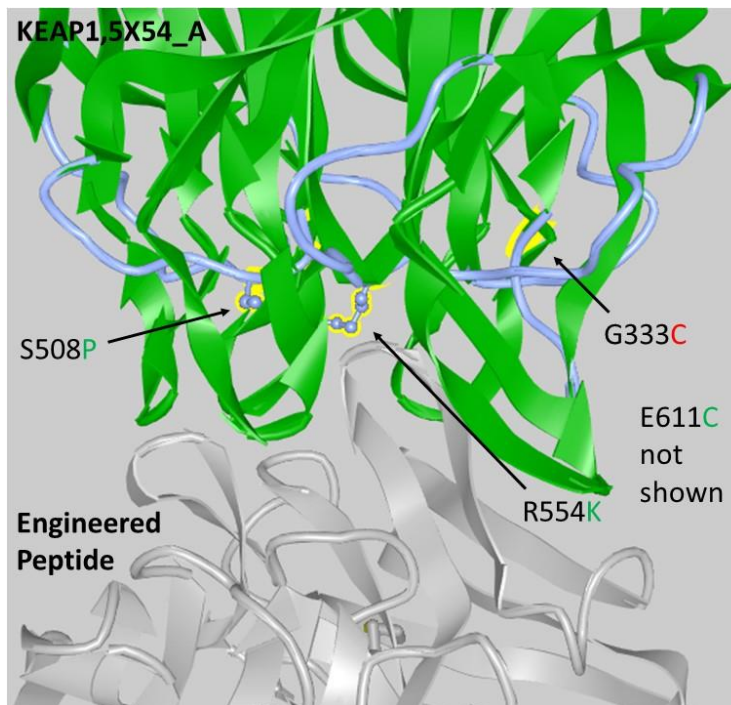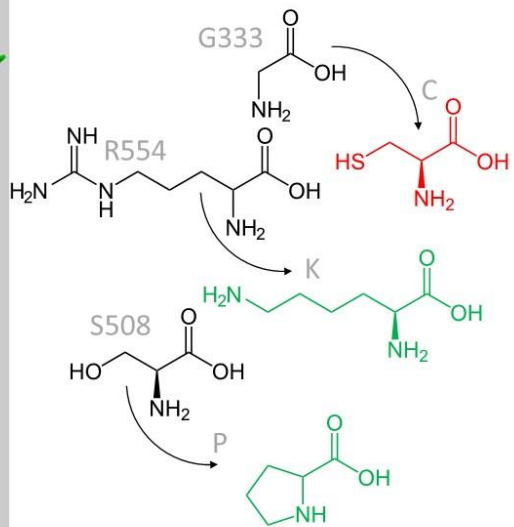

78

79

Supplementary Figure 10. Detailed View of *KEAP1* Structure

GNAS, 1CS4\_C

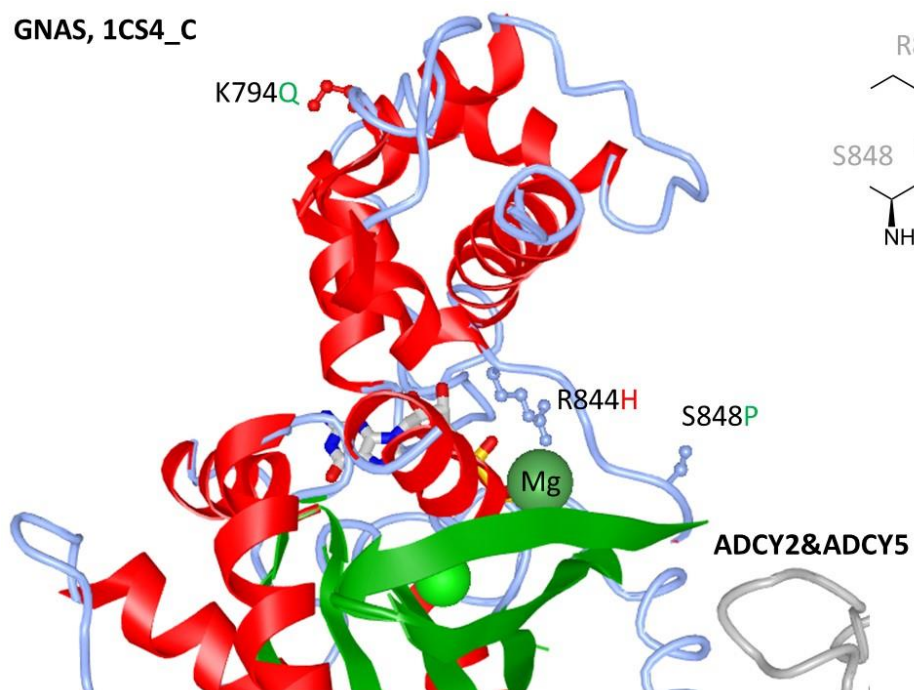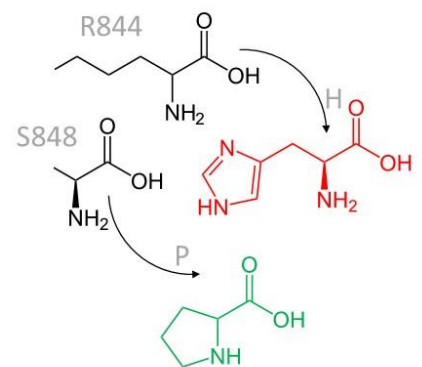

80

81

Supplementary Figure 11. Detailed View of *GNAS* Structure

ERBB2(HER2), 3PP0

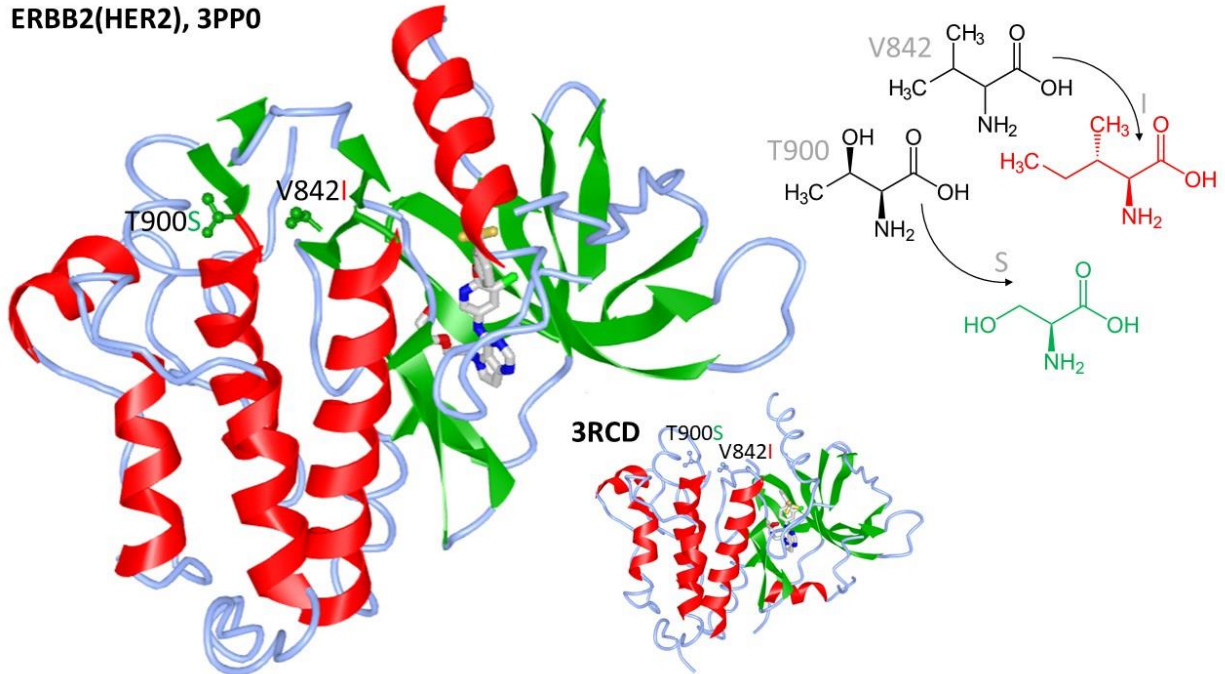

82

83 **Supplementary Figure 12. Detailed View of *ERBB2* Structure**

84

EPHA2, 3MX0\_A

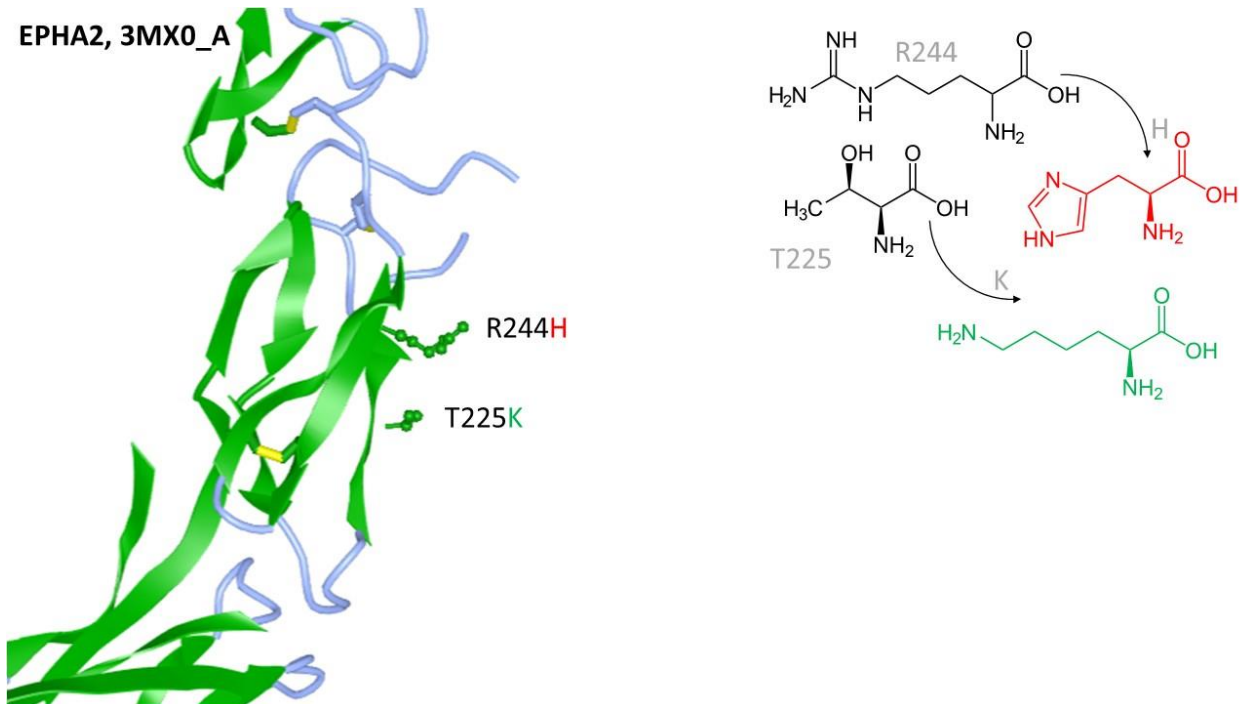

85

86 **Supplementary Figure 13. Detailed View of *EPHA2* Structure**



CTCF, 5UND\_A

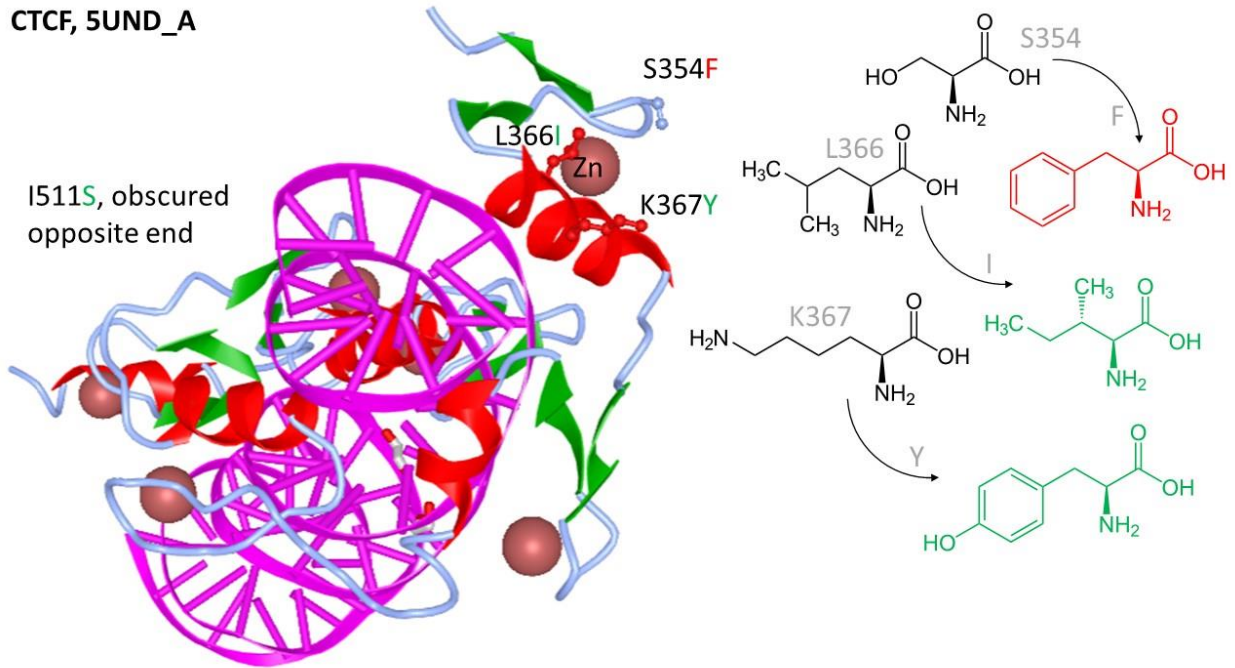

87

88 **Supplementary Figure 14. Detailed View of CTCF Structure**

BRAF, 4H58\_A

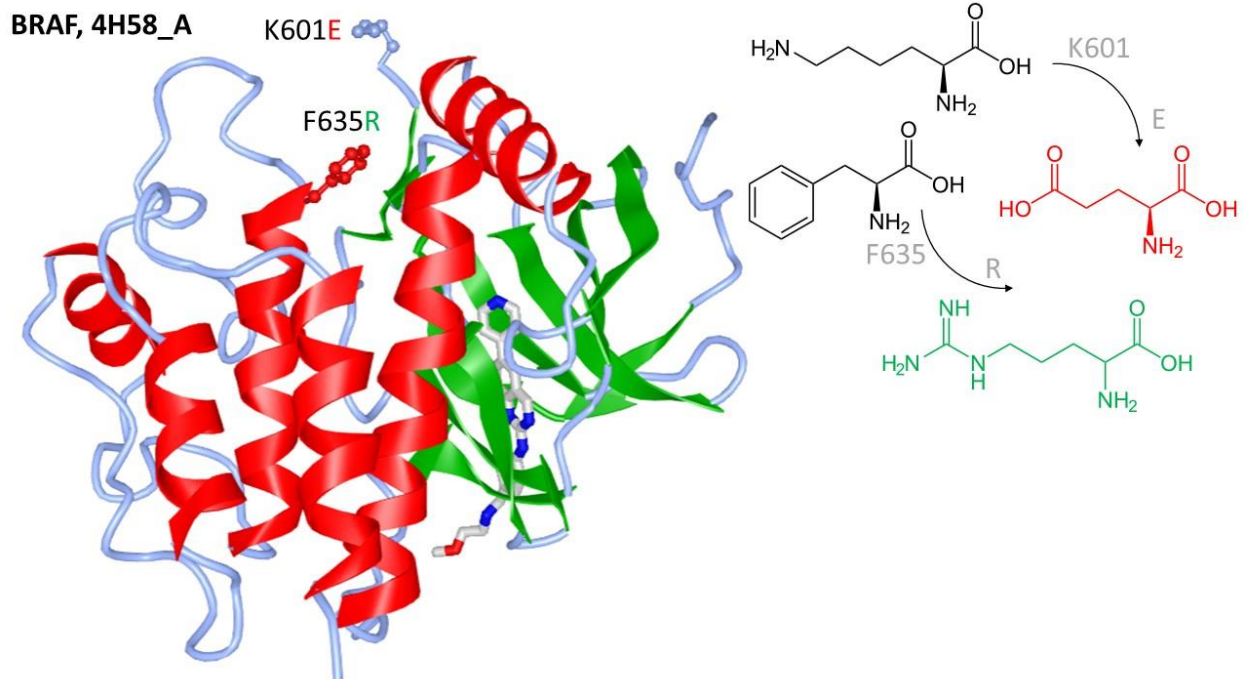

89

90 **Supplementary Figure 15. Detailed View of BRAF Structure**

91

**RAC1, 5HZH**

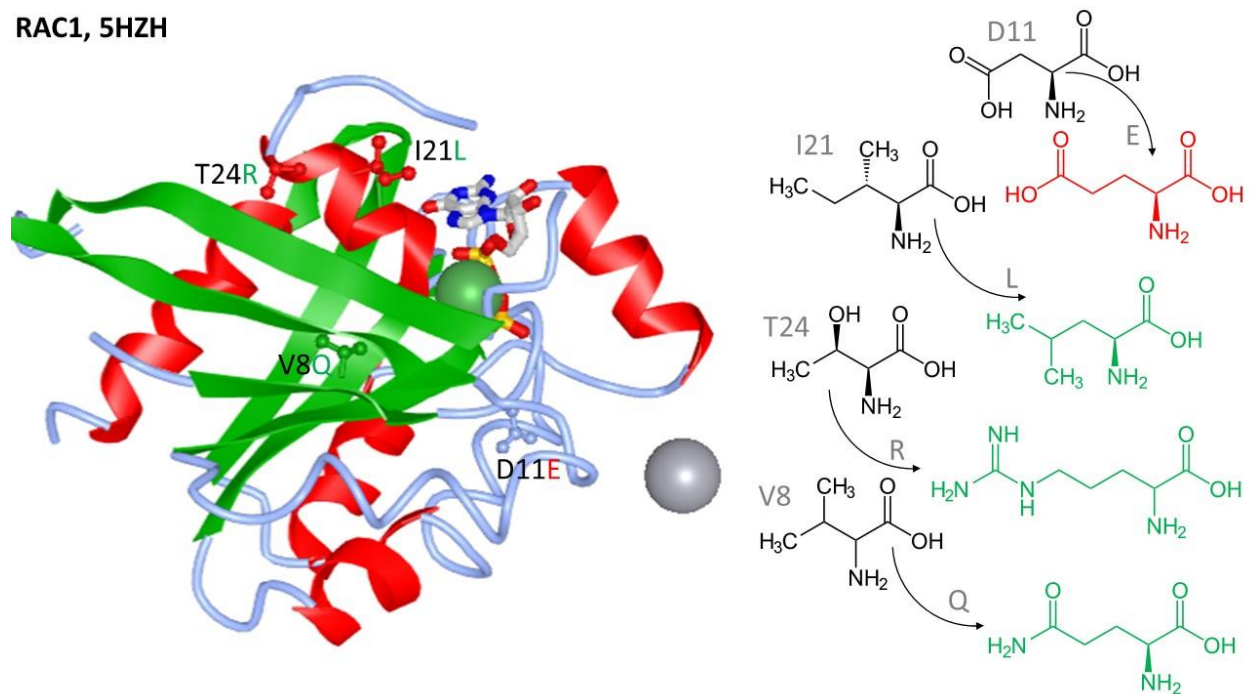

92

93 **Supplementary Figure 16. Detailed View of RAC1 Structure**

94

**PIK3CA, 5DXT\_A**

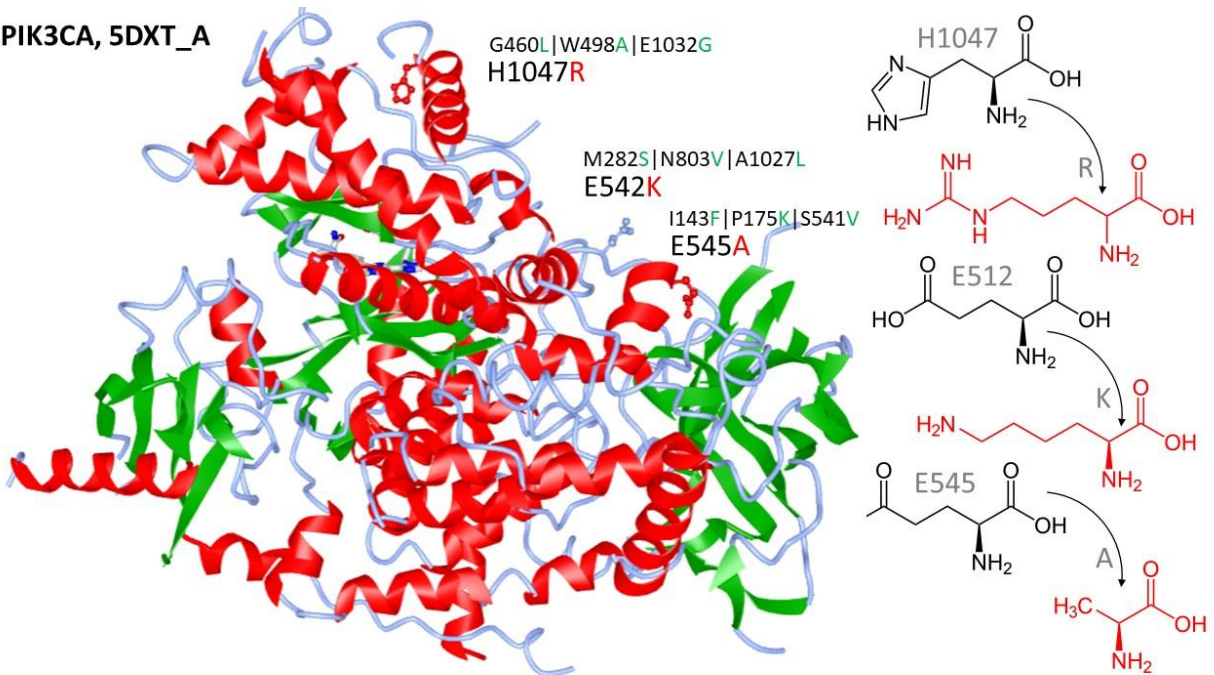

95

96 **Supplementary Figure 17. Detailed View of PIK3CA Structure**

97

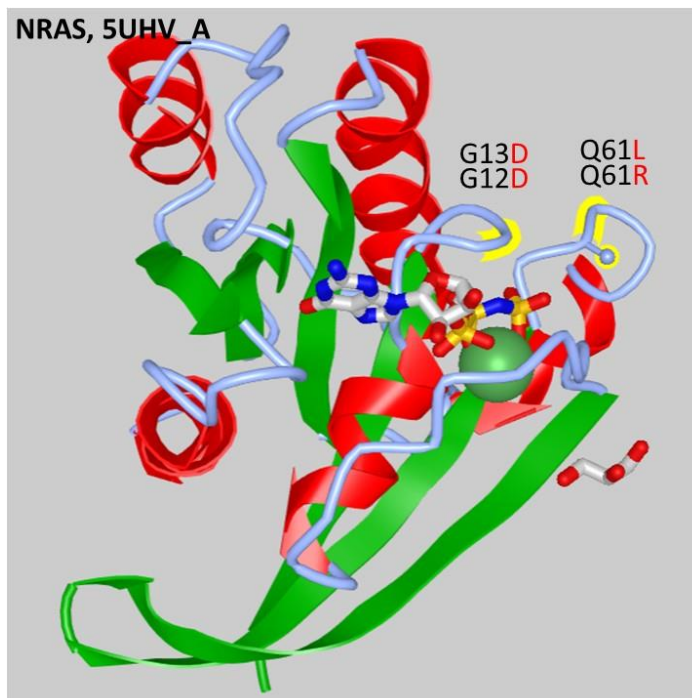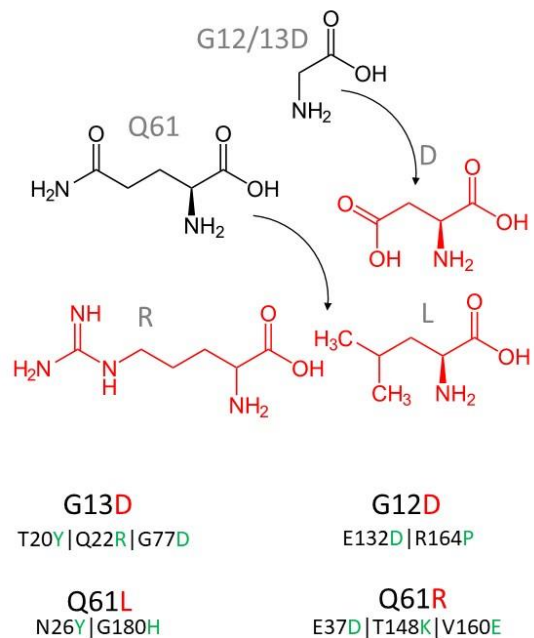

98

99 **Supplementary Figure 18. Detailed View of NRAS Structure**

PTPN11, 4NWG

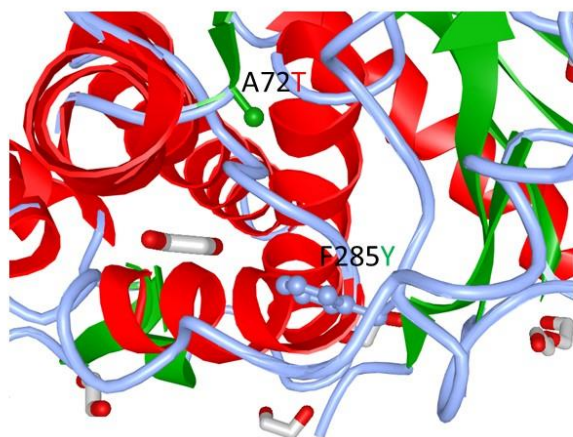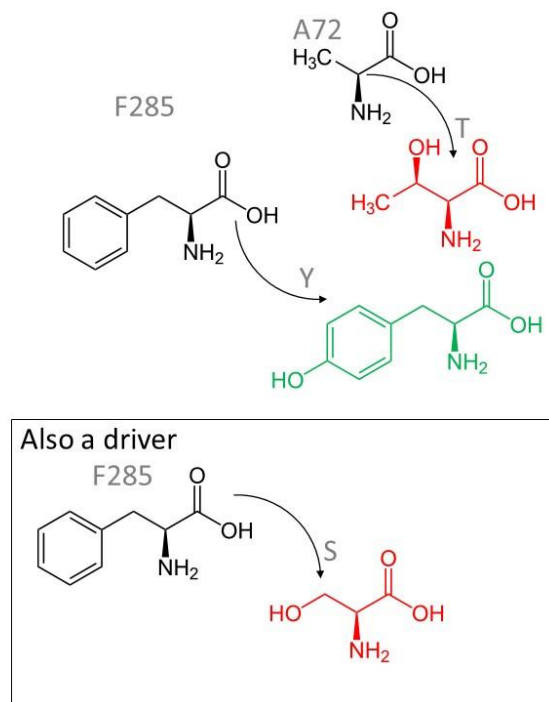

100

101 **Supplementary Figure 19. Structure of PTPN11 with E139D mutation, PDB ID:**

102 **4NWG**

103

104

105  
106  
107

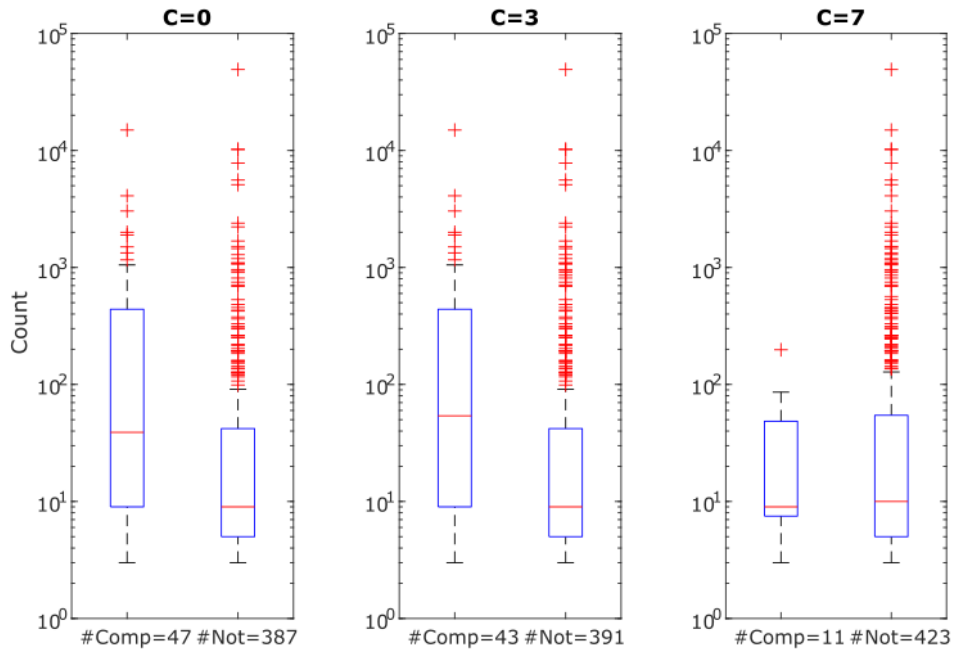

108

109 **Supplementary Figure 20. Differing Prevalence Among Tumors Between Drivers**

110 **with Putative Compensators and those Without.** For each driver, given a cutoff, C,

111 mutations with high association scores (see Methods: Calculation of Association Score

112 for Pairs of Mutations) paired with that driver among both species and tumors were

113 identified as putative compensators. The 434 drivers considered were then divided into

114 two ensembles based on the identification of at least one putative compensator. Drivers

115 with at least one such mutation identified are more frequently observed (total number of

116 tumors, both compensated and uncompensated) among tumors insensitive to the

117 threshold used. **Note1:** Drivers with a higher overall count are more likely to support

118 evidence of compensation simply because there are greater opportunities for

119 statistically significant associations with a larger number of observations. **Note2:** Many

120 putative compensators are observed in the minority of tumors harboring the associated

121 driver and such a driver is placed in the “compensated” ensemble even if that driver is

122 more often observed “uncompensated”.



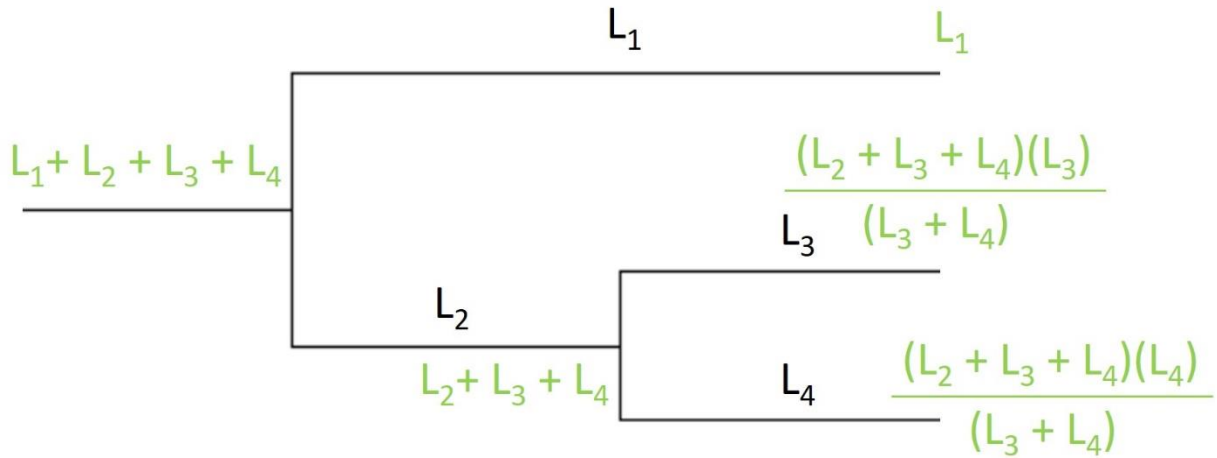

123

124 **Supplementary Figure 21. Illustration of Leaf-Weighting Procedure** Branch lengths

125 are labelled  $L_i$ .

126

127

128

129

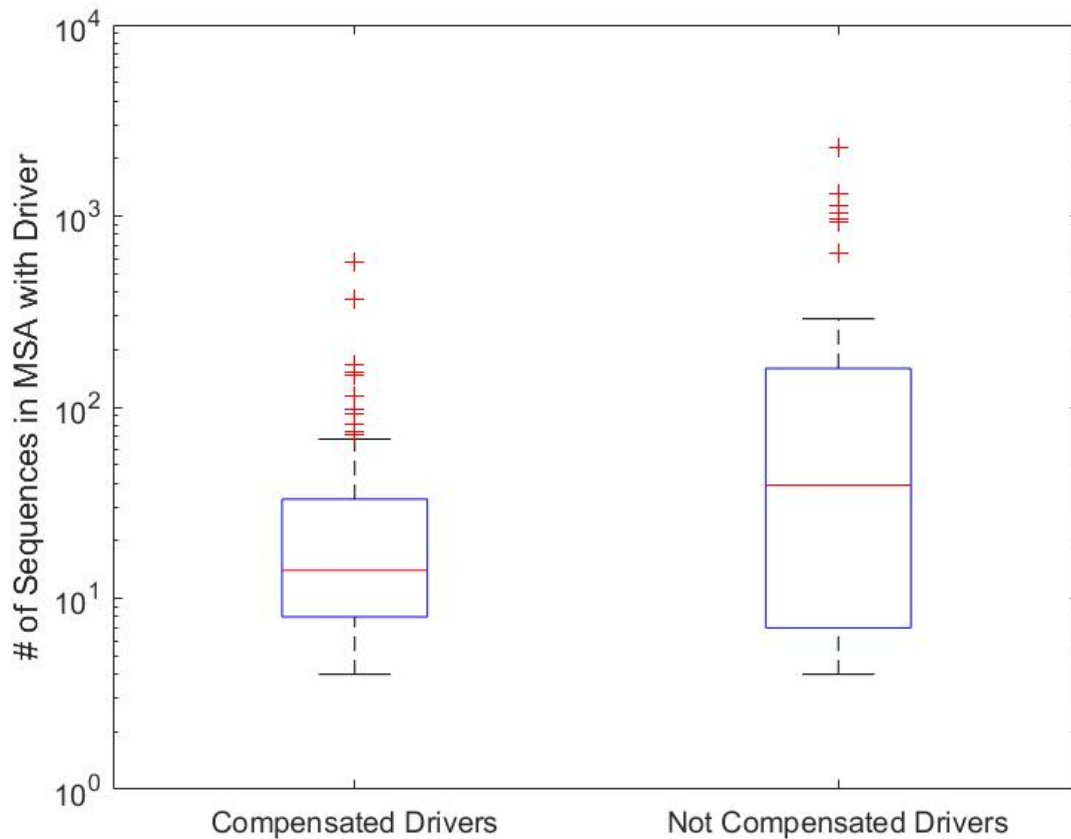

130

131 **Supplementary Figure 22. Differing Prevalence Among Species Between Drivers**

132 **with Compensatory Ensembles and those Without** All drivers which appear in at

133 least four leaves were divided into two groups: those for which a compensatory

134 ensemble was constructed, and those without. Drivers without a compensatory

135 ensemble tend to be more frequently observed in the MSA than those with a

136 compensatory ensemble.

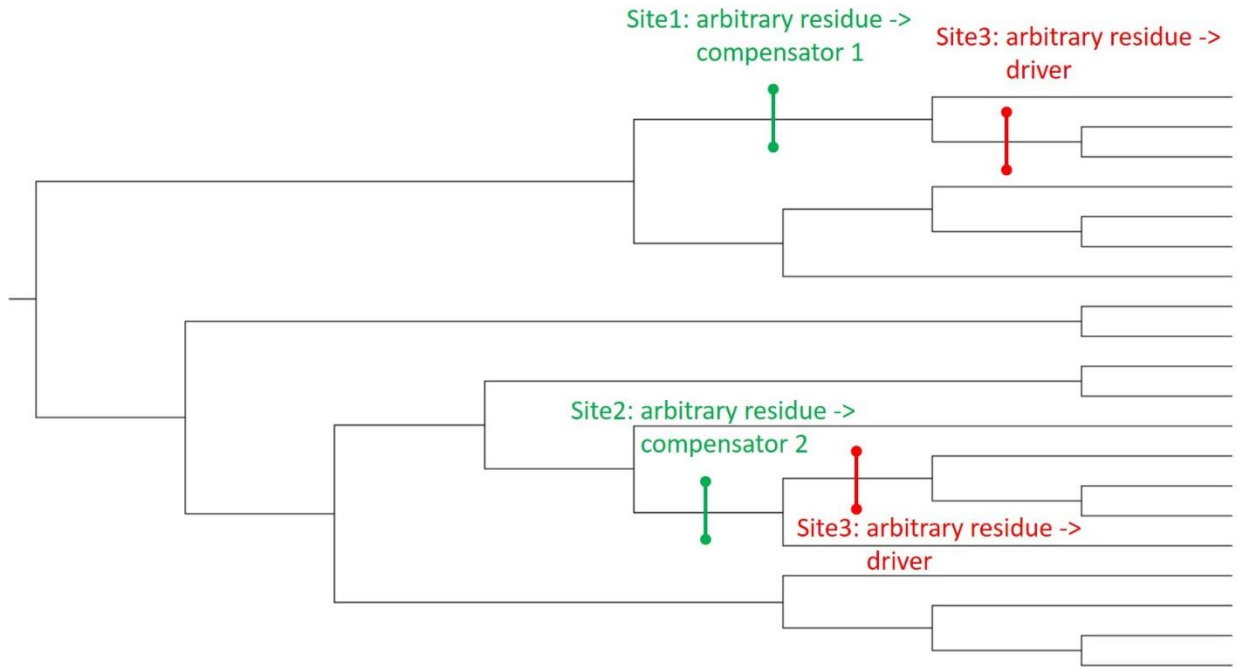

137

138 **Supplementary Figure 23. Cartoon of Driver/Compensatory Ensemble**

139

140

141

142

143

144

145

146

147

148

## 149 **References**

150

151 [1] Rohland, N., & Reich, D. Cost-effective, high-throughput DNA sequencing libraries for multiplexed  
152 target capture. *Genome research* **22(5)**, 939-946 (2012).

153

154 [2] Forbes, S. A., et al. COSMIC (the Catalogue of Somatic Mutations in Cancer): a resource to  
155 investigate acquired mutations in human cancer. *Nucleic acids research* **38(suppl\_1)**, D652-D657 (2009).

156

157 [3] Weinstein, J. N. et al. The cancer genome atlas pan-cancer analysis project. *Nature genetics* **45(10)**,  
158 1113 (2013).

159

160 [4] Bailey, M. H. et al. Comprehensive characterization of cancer driver genes and mutations. *Cell* **173(2)**,  
161 371-385 (2018).

162

163 [5] Tamborero, D. et al. Comprehensive identification of mutational cancer driver genes across 12 tumor  
164 types. *Scientific reports* **3**, 2650 (2013).

165

166 [6] Stratton, M. R., Campbell, P. J., & Futreal, P. A. The cancer genome. *Nature* **458(7239)**, 719 (2009).

167

168 [7] Iranzo, J., Martincorena, I., & Koonin, E. V. Cancer-mutation network and the number and specificity of  
169 driver mutations. *Proceedings of the National Academy of Sciences* **115(26)**, E6010-E6019 (2018).

170

171 [8] Fearon, E. R., & Vogelstein, B. A genetic model for colorectal tumorigenesis. *Cell* **61(5)**, 759-767  
172 (1990).

173

174 [9] van de Haar, J., Canisius, S., Michael, K. Y., Voest, E. E., Wessels, L. F., & Ideker, T. Identifying  
175 Epistasis in Cancer Genomes: A Delicate Affair. *Cell* **177(6)**, 1375-1383 (2019).

176

177 [10] Wang, X., Fu, A. Q., Mc Nerney, M. E., & White, K. P. Widespread genetic epistasis among cancer  
178 genes. *Nature communications* **5**, 4828 (2014).

179

180 [11] Park, S., & Lehner, B. Cancer type-dependent genetic interactions between cancer driver alterations  
181 indicate plasticity of epistasis across cell types. *Molecular systems biology* **11(7)** (2015).

182

183 [12] Matlak, D., & Szczurek, E. Epistasis in genomic and survival data of cancer patients. *PLoS*  
184 *computational biology* **13(7)**, e1005626 (2017).

185

186 [13] Auslander, N., Wolf, Y. I., & Koonin, E. V. In silico learning of tumor evolution through mutational time  
187 series. *Proceedings of the National Academy of Sciences* **116(19)**, 9501-9510 (2019).  
188

189 [14] Gerstung, M., Eriksson, N., Lin, J., Vogelstein, B., & Beerewinkel, N. The temporal order of genetic  
190 and pathway alterations in tumorigenesis. *PloS one* **6(11)**, e27136 (2011).  
191

192 [15] Persi, E., Wolf, Y. I., Leiserson, M. D., Koonin, E. V., & Ruppin, E. Criticality in tumor evolution and  
193 clinical outcome. *Proceedings of the National Academy of Sciences* **115(47)**, E11101-E11110 (2018).  
194

195 [16] McFarland, C. D., Korolev, K. S., Kryukov, G. V., Sunyaev, S. R., & Mirny, L. A. Impact of deleterious  
196 passenger mutations on cancer progression. *Proceedings of the National Academy of Sciences* **110(8)**,  
197 2910-2915 (2013).  
198

199 [17] Sharma, P., Hu-Lieskovan, S., Wargo, J. A., & Ribas, A. Primary, adaptive, and acquired resistance  
200 to cancer immunotherapy. *Cell* **168(4)**, 707-723 (2017).  
201

202 [18] Kachalaki, S., Ebrahimi, M., Khosroshahi, L. M., Mohammadinejad, S., & Baradaran, B. Cancer  
203 chemoresistance; biochemical and molecular aspects: a brief overview. *European journal of*  
204 *pharmaceutical sciences* **89**, 20-30 (2016).  
205

206 [19] Sakai, W. et al. Secondary mutations as a mechanism of cisplatin resistance in BRCA2-mutated  
207 cancers. *Nature* **451(7182)**, 1116 (2008).  
208

209 [20] Hirschhorn, R. In vivo reversion to normal of inherited mutations in humans. *Journal of medical*  
210 *genetics* **40(10)**, 721-728 (2003).  
211

212 [21] Waisfisz, Q. et al. Spontaneous functional correction of homozygous fanconi anaemia alleles reveals  
213 novel mechanistic basis for reverse mosaicism. *Nature genetics* **22(4)**, 379 (1999).  
214

215 [22] Hamanoue, S., Yagasaki, H., Tsuruta, T., Oda, T., Yabe, H., Yabe, M., & Yamashita, T. Myeloid  
216 lineage-selective growth of revertant cells in Fanconi anaemia. *British journal of haematology* **132(5)**,  
217 630-635 (2006).  
218

219 [23] Nikolova, P. V., Wong, K. B., DeDecker, B., Henckel, J., & Fersht, A. R. Mechanism of rescue of  
220 common p53 cancer mutations by second-site suppressor mutations. *The EMBO journal* **19(3)**, 370-378  
221 (2000).  
222

223 [24] Joerger, A. C., Allen, M. D., & Fersht, A. R. Crystal Structure of a Superstable Mutant of Human p53  
224 Core Domain Insights Into The Mechanism Of Rescuing Oncogenic Mutations. *Journal of Biological*  
225 *Chemistry* **279(2)**, 1291-1296 (2004).  
226

227 [25] Joerger, A. C., Ang, H. C., Veprintsev, D. B., Blair, C. M., & Fersht, A. R. Structures of p53 cancer  
228 mutants and mechanism of rescue by second-site suppressor mutations. *Journal of Biological*  
229 *Chemistry* **280(16)**, 16030-16037 (2005).  
230

231 [26] Baroni, T. E. et al. A global suppressor motif for p53 cancer mutants. *Proceedings of the National*  
232 *Academy of Sciences* **101(14)**, 4930-4935 (2004).  
233

234 [27] Qutob, N. et al. RGS7 is recurrently mutated in melanoma and promotes migration and invasion of  
235 human cancer cells. *Scientific reports* **8(1)**, 653 (2018).  
236

237 [28] Mateu, M. G., & Fersht, A. R. Mutually compensatory mutations during evolution of the  
238 tetramerization domain of tumor suppressor p53 lead to impaired hetero-oligomerization. *Proceedings of*  
239 *the National Academy of Sciences* **96(7)**, 3595-3599 (1999).  
240

241 [29] Loll, P. J. Membrane proteins, detergents and crystals: what is the state of the art?. *Acta*  
242 *Crystallographica Section F: Structural Biology Communications* **70(12)**, 1576-1583 (2014).  
243

244 [30] Bolla, J. R., Su, C. C., & Yu, E. W. Biomolecular membrane protein crystallization. *Philosophical*  
245 *Magazine* **92(19-21)**, 2648-2661 (2012).  
246

247 [31] Hardy, D., Mandon, E. D., Rothnie, A. J., & Jawhari, A. The yin and yang of solubilization and  
248 stabilization for wild-type and full-length membrane protein. *Methods* **147**, 118-125 (2018).  
249

250 [32] Rogers, M. F., Shihab, H. A., Mort, M., Cooper, D. N., Gaunt, T. R., & Campbell, C. FATHMM-XF:  
251 accurate prediction of pathogenic point mutations via extended features. *Bioinformatics*, **34(3)**, 511-513  
252 (2017).  
253

254 [33] UniProt Consortium. UniProt: a worldwide hub of protein knowledge. *Nucleic acids research*, **47(D1)**,  
255 D506-D515 (2018).  
256

257 [34] Pruitt, K. D., & Maglott, D. R. RefSeq and LocusLink: NCBI gene-centered resources. *Nucleic acids*  
258 *research* **29(1)**, 137-140 (2001).  
259

260 [35] Fricke, I., & Berken, A. Molecular basis for the substrate specificity of plant guanine nucleotide  
261 exchange factors for ROP. *FEBS letters* **583(1)**, 75-80 (2009).  
262

263 [36] Worthylake, D. K., Rossman, K. L., & Sondek, J. Crystal structure of Rac1 in complex with the  
264 guanine nucleotide exchange region of Tiam1. *Nature* **408(6813)**, 682 (2000).  
265

266 [37] Salgia R. Fibroblast growth factor signaling and inhibition in non-small cell lung cancer and their role  
267 in squamous cell tumors. *Cancer medicine* **3(3)**, 681-92 (2014).  
268

269 [38] Reinhardt, T. & Hinoran, A. Autotracer.org (Raster image to vector conversion platform).  
270 <https://www.autotracer.org/>  
271

272 [39] Zheng D et al. EGFR G796D mutation mediates resistance to osimertinib. *Oncotarget* **8(30)**, 49671  
273 (2017).  
274

275 [40] Berman, H.M. et al. The Protein Data Bank. *Nucleic Acids Research* **28(1)**, 235–242 (2000).  
276

277 [41] Baretić, Domagoj, et al. Structures of closed and open conformations of dimeric human ATM.  
278 *Science advances* **3(5)**, e1700933 (2017).  
279

280 [42] Zhang, B., Zhang, Y., & Shacter, E. Caspase 3-mediated inactivation of rac GTPases promotes  
281 drug-induced apoptosis in human lymphoma cells. *Molecular and cellular biology* **23(16)**, 5716-5725  
282 (2003).  
283

284 [43] Singh, Anju, et al. Dysfunctional KEAP1–NRF2 interaction in non-small-cell lung cancer. *PLoS*  
285 *medicine* **3(10)**, e420 (2006).  
286

287 [44] Amino Acid Vector Images by NEUROtiker - Own work, Public Domain  
288 <https://commons.wikimedia.org/w/index.php?curid=1637087>  
289

290 [45] Aertgeerts, Kathleen, et al. Structural analysis of the mechanism of inhibition and allosteric activation  
291 of the kinase domain of HER2 protein. *Journal of Biological Chemistry* **286(21)**, 18756-18765 (2011).  
292

293 [46] Ishikawa, Tomoyasu, et al. Design and synthesis of novel human epidermal growth factor receptor 2  
294 (HER2)/epidermal growth factor receptor (EGFR) dual inhibitors bearing a pyrrolo [3, 2-d] pyrimidine  
295 scaffold. *Journal of medicinal chemistry* **54(23)**, 8030-8050 (2011).  
296

297 [47] Vasbinder, Melissa M., et al. Discovery and optimization of a novel series of potent mutant B-  
298 RafV600E selective kinase inhibitors. *Journal of medicinal chemistry* **56(5)**, 1996-2015 (2013).  
299

300 [48] Himanen, Juha P., et al. Architecture of Eph receptor clusters. *Proceedings of the National Academy*  
301 *of Sciences* **107(24)**, 10860-10865 (2010).  
302

303 [49] Johnson, Christian W., et al. The small GTPases K-Ras, N-Ras, and H-Ras have distinct biochemical  
304 properties determined by allosteric effects. *Journal of Biological Chemistry* **292(31)** 12981-12993 (2017).  
305

306 [50] dal Maso, Emma, et al. The Molecular Control of Calcitonin Receptor Signaling. *ACS Pharmacology*  
307 *& Translational Science* **2(1)**, 31-51 (2019).  
308

309 [51] Tesmer, John JG, et al. Molecular basis for P-site inhibition of adenylyl cyclase. *Biochemistry* **39(47)**,  
310 14464-14471 (2000).  
311

312 [52] Dagliyan, Onur, et al. Engineering extrinsic disorder to control protein activity in living cells. *Science*  
313 **354(6318)**, 1441-1444 (2016).  
314

315 [53] Sogabe, Satoshi, et al. Discovery of a Kelch-like ECH-associated protein 1-inhibitory tetrapeptide and  
316 its structural characterization. *Biochemical and biophysical research communications* **486(3)**, 620-625  
317 (2017).  
318

319 [54] Liu, X., Coker, S., Ceska, T., Baker, T. De novo design and crystallographic validation of antibodies  
320 targeting a pre-selected epitope. To be published.  
321

322 [55] Hashimoto, Hideharu, et al. Structural basis for the versatile and methylation-dependent binding of  
323 CTCF to DNA. *Molecular cell* **66(5)**, 711-720 (2017).  
324

325 [56] Heffron, Timothy P., et al. The Rational Design of Selective Benzoxazepin Inhibitors of the  $\alpha$ -Isoform  
326 of Phosphoinositide 3-Kinase Culminating in the Identification of (S)-2-((2-(1-Isopropyl-1 H-1, 2, 4-triazol-  
327 5-yl)-5, 6-dihydrobenzo [f] imidazo [1, 2-d][1, 4] oxazepin-9-yl) oxy) propanamide (GDC-0326). *Journal of*  
328 *medicinal chemistry* **59(3)**, 985-1002 (2016).  
329

330 [57] Kops, G. J., Weaver, B. A., & Cleveland, D. W. On the road to cancer: aneuploidy and the mitotic  
331 checkpoint. *Nature Reviews Cancer* **5(10)**, 773-785 (2005).  
332



333 [58] Ben-David, Uri, and Angelika Amon. Context is everything: aneuploidy in cancer. *Nature Reviews*  
334 *Genetics* 1-19 (2019).  
335

336 [59] Chen, W., Li, Y., & Wang, Z. Evolution of oncogenic signatures of mutation hotspots in tyrosine  
337 kinases supports the atavistic hypothesis of cancer. *Scientific reports* **8(1)**, 1-8 (2018).  
338

339 [60] Gültas, M., Haubrock, M., Tüysüz, N., & Waack, S. Coupled mutation finder: A new entropy-based  
340 method quantifying phylogenetic noise for the detection of compensatory mutations. *BMC*  
341 *bioinformatics* **13(1)** 225 (2012).  
342

343 [61] Hopf, T. A. et al. The EVcouplings Python framework for coevolutionary sequence  
344 analysis. *Bioinformatics* **35(9)** 1582-1584 (2019).  
345

346 [62] Stiffler, M. A. et al. Protein structure from experimental evolution. *Cell Systems* (2019).  
347

348 [63] Qiu, W. et al. To Be Published  
349

350 [64] Malhis, N., Jones, S. J., & Gsponer, J. Improved measures for evolutionary conservation that exploit  
351 taxonomy distances. *Nature communications* **10(1)**, 1-8 (2019).  
352

353 [65] Breen, M. S., Kemena, C., Vlasov, P. K., Notredame, C., & Kondrashov, F. A. Epistasis as the  
354 primary factor in molecular evolution. *Nature* **490(7421)**, 535 (2012).  
355

356 [66] Kondrashov, A. S., Sunyaev, S., & Kondrashov, F. A. Dobzhansky–Muller incompatibilities in protein  
357 evolution. *Proceedings of the National Academy of Sciences* **99(23)**, 14878-14883 (2002).  
358

359 [67] Gao, L., & Zhang, J. Why are some human disease-associated mutations fixed in mice? *Trends in*  
360 *Genetics* **19(12)**, 678-681 (2003).  
361

362 [68] Poon, A., Davis, B. H., & Chao, L. The coupon collector and the suppressor mutation: estimating the  
363 number of compensatory mutations by maximum likelihood. *Genetics* **170(3)**, 1323-1332 (2005).  
364

365 [69] Camps, M., Herman, A., Loh, E. R. N., & Loeb, L. A. Genetic constraints on protein evolution. *Critical*  
366 *reviews in biochemistry and molecular biology* **42(5)**, 313-326 (2007).  
367

368 [70] Altschul, Stephen F., et al. Gapped BLAST and PSI-BLAST: a new generation of protein database  
369 search programs. *Nucleic acids research* **25(17)**, 3389-3402 (1997).

370  
371 [71] Wolf, Yuri I., et al. Origins and evolution of the global RNA virome. *MBio* **9(6)**, e02329-18 (2018).  
372  
373 [72] Price, Morgan N., Paramvir S. Dehal, and Adam P. Arkin. FastTree 2—approximately maximum-  
374 likelihood trees for large alignments. *PloS one* **5(3)**, e9490 (2010).  
375  
376 [71] Yutin, Natalya, et al. The deep archaeal roots of eukaryotes. *Molecular biology and evolution* **25(8)**,  
377 1619-1630 (2008).  
378  
379 [74] Makarova, Kira, Yuri Wolf, and Eugene Koonin. Archaeal clusters of orthologous genes (arCOGs): an  
380 update and application for analysis of shared features between Thermococcales, Methanococcales, and  
381 Methanobacteriales. *Life* **5(1)**, 818-840 (2015).  
382  
383 [75] Fitch, Walter M. Toward defining the course of evolution: minimum change for a specific tree  
384 topology. *Systematic Biology* **20(4)**, 406-416 (1971).
