# Supplementary material for: Deep phylogeny of cancer drivers and compensatory mutations
Source: PubMed Central journal article supplement (PMC7532533; doi:10.1038/s42003-020-01276-7), 2020-10-02
Supplement: 42003_2020_1276_MOESM2_ESM.pdf [file 42003_2020_1276_MOESM2_ESM.pdf]

## Description of Additional Supplementary Files

File Name: Supplementary Data 1

Description:

Name= "GENE|RefseqID"

Newick(leaves)= "Reduced\_Taxonomy\_|RefseqID"

Newick tree files with leaves labelled as follows are made available in tab delimited format with two fields, "Name" and "Newick". Supplementary Data 1 contains one tree for each of the 84 driver genes studied in this work.

File Name: Supplementary Data 2

Description: drivers present in 3 or more leaves

Excel file containing relevant structure, tree presentation, and literature references.

File Name: Supplementary Data 3

Description: drivers present in 3 or more leaves

Text file containing reduced alignments of i) all human sequences present in the MSA; ii) representative sequences across the phylogenetic depth of the MSA; and iii) representative sequences harboring the mutation(s) of interest; a list of the most frequent mutations in COSMIC; and a logical representation of their status as a recognized common human polymorphism:

File Name: Supplementary Data 4

Description:

Name= "GENE|RefseqID|DriverAA"

Newick(leaves)= "Reduced\_Taxonomy\_|\_Driver.Index\_|RefseqID"

Newick tree files with leaves labelled as follows are made available in tab delimited format with two fields, "Name" and "Newick". Supplementary Data 4 contains one tree for each driver present in 3 or more leaves. Each driver is labelled Driver.Index. The drivers are indexed over the number of times a transition to the driver appears in the tree.

File Name: Supplementary Data 5

Description: all "associated pairs" in the MSA with a driver

Excel file containing relevant structure, tree presentation, and literature references.

File Name: Supplementary Data 6

Description: all "associated pairs" in the MSA with a driver

Text file containing reduced alignments of i) all human sequences present in the MSA; ii) representative sequences across the phylogenetic depth of the MSA; and iii) representative sequences harboring the mutation(s) of interest; a list of the most frequent mutations in COSMIC; and a logical representation of their status as a recognized common human polymorphism:

File Name: Supplementary Data 7

Description: all "associated pairs" in the COSMIC database with a driver

Excel file containing relevant structure, tree presentation, and literature references.

File Name: Supplementary Data 8

Description: all “associated pairs” in the COSMIC database with a driver

Text file containing reduced alignments of i) all human sequences present in the MSA; ii) representative sequences across the phylogenetic depth of the MSA; and iii) representative sequences harboring the mutation(s) of interest; a list of the most frequent mutations in COSMIC; and a logical representation of their status as a recognized common human polymorphism:

File Name: Supplementary Data 9

Description: outlier “associated pairs” in both the MSA and COSMIC

Excel file containing relevant structure, tree presentation, and literature references.

File Name: Supplementary Data 10

Description: outlier “associated pairs” in both the MSA and COSMIC

Text file containing reduced alignments of i) all human sequences present in the MSA; ii) representative sequences across the phylogenetic depth of the MSA; and iii) representative sequences harboring the mutation(s) of interest; a list of the most frequent mutations in COSMIC; and a logical representation of their status as a recognized common human polymorphism:

File Name: Supplementary Data 11

Description: compensators which have a mutation in the same site in COSMIC

Excel file containing relevant structure, tree presentation, and literature references.

5

File Name: Supplementary Data 12

Description: all compensatory ensembles

Excel file containing relevant structure, tree presentation, and literature references.

File Name: Supplementary Data 13

Description: all compensatory ensembles

Text file containing reduced alignments of i) all human sequences present in the MSA; ii) representative sequences across the phylogenetic depth of the MSA; and iii) representative sequences harboring the mutation(s) of interest; a list of the most frequent mutations in COSMIC; and a logical representation of their status as a recognized common human polymorphism:

File Name: Supplementary Data 14

Description:

Name= “GENE|RefseqID|DriverAA|Compensatory\_Ensemble\_AA”

Newick(leaves)= “Reduced\_Taxonomy\_|\_Driver.Index\_|\_t1.Index1.Index2\_|RefseqID”

Newick tree files with leaves labelled as follows are made available in tab delimited format with two fields, “Name” and “Newick”. Supplementary Data 14 contains one tree for each compensatory ensemble. Each compensatory mutation is labelled t1.Index1.Index2 (“t1” because the transition to the compensatory mutation appears

ancestral to the “t2” driver). The drivers are indexed over the number of times a transition to the driver appears in the tree. Index1 specifies the member of the compensatory ensemble and Index2 specifies the transition to that compensatory mutation. “FALSE” appears in place of the driver index or Index2 for leaves in these labelled clades which do not harbor the state in the extant sequence. Transitions to every driver are labelled; however, only transitions to compensators which are ancestral to drivers are labelled and in many cases, there are many unlabeled compensators in the tree. In cases where a leaf shares multiple labelled ancestral states, the leaf label reflects all labels.

File Name: Supplementary Data 15

Description: symbol, name, accession code

Text file containing the gene symbol, gene name, and protein accession code.
